# Supplementary material for: Lead(iv) acetate: intriguing reactivity profile
Source: Royal Society of Chemistry journal article supplement (doi:10.1039/b708268a), 2007-01-01
Supplement: b708268a.pdf [file b708268a.pdf]

Supplementary Material (ESI) for Chemical Communications  
This journal is (c) The Royal Society of Chemistry 2007

## **Lead(IV) acetate: intriguing reactivity profile**

Faiz Ahmed Khan,\* Ch. Sudheer and Laxminarayana Soma

Department of Chemistry, Indian Institute of Technology, Kanpur 208 016, India. Fax:  
+91 512-2597436; Tel: +91 512-2597864; E-mail: faiz@iitk.ac.in

# Supplementary Material (ESI) for Chemical Communications

# This journal is (c) The Royal Society of Chemistry 2007

### Table of contents

Page 2; General methods

Page 2; Procedure for the preparation of compound **4b**

Page 3; General procedure for the preparation of compounds **4a** and **10a**

Page 4; Spectral and analytical data for compounds **c** and **d**

Page 13; X-ray crystal structure of **1d**

Page 14; X-ray crystal structure of **6c**

Page 15; X-ray crystal structure of **10c**

Page 16; X-ray crystal structure of **13c**

Page 17; X-ray crystal structure of **14d**

Page 18; Computational details

### **General Methods**

NMR spectra were recorded at 400 MHz ( $^1\text{H}$ ) and 100 MHz ( $^{13}\text{C}$ ) on a 400 MHz FT-NMR spectrometer. Samples for NMR were made in  $\text{CDCl}_3$  and TMS was used as the internal standard. Melting points were recorded on JSGW melting point apparatus and are uncorrected. TLC was performed on silica gel coated on microscopic slides. Visualization of spots was effected by exposure to iodine or spraying with 4% ethanolic  $\text{H}_2\text{SO}_4$  and charring. Column chromatography was performed using silica gel (100-200 mesh), and ethyl acetate-hexane was used as eluent. Solvents and reagents were purified by standard methods. X-ray data were collected on a Bruker SMART APEX diffractometer. The structures were solved using SIR-92<sup>1</sup> and refined using SHELXL-97.<sup>2</sup>

Procedure for the preparation of compound **4b**

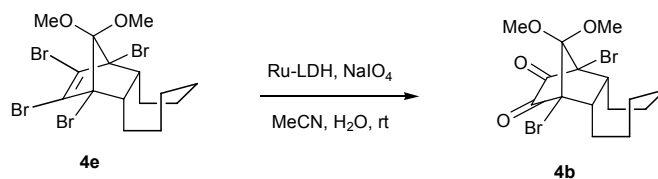

To a stirred solution of **4e** (1 mmol) in acetonitrile (12 mL), were added  $\text{NaIO}_4$ , Ru-LDH (0.86 mol% of  $\text{RuCl}_3 \cdot 3\text{H}_2\text{O}$ , 40 mg) and distilled  $\text{H}_2\text{O}$  (2 mL) and the mixture was allowed to stir at room temperature until the completion of the reaction (monitored by TLC). The mixture was filtered and the residue was washed with MeCN. The filtrate (along with MeCN washings) was concentrated under reduced pressure and the crude mixture was dissolved in EtOAc (10 mL), washed first with  $\text{Na}_2\text{S}_2\text{O}_3$  solution (3 mL) and then with brine (3 mL). EtOAc was dried over anhyd.  $\text{Na}_2\text{SO}_4$  and concentrated to obtain the crude product, which after silica gel column chromatography (hexane and EtOAc) furnished the pure diketone **4b**.

Compound **4e**: yield 91%; white solid; mp 78 – 80 °C;  $^1\text{H}$  NMR (400 MHz,  $\text{CDCl}_3$ )  $\delta$  3.62 (s, 3H, OMe), 3.55 (s, 3H, OMe), 2.54 (dd, 2H,  $J = 7.4, 2.1$  Hz), 1.91 (dd, 2H,  $J = 11.0, 4.5$  Hz), 1.67 – 1.64 (m, 2H), 1.37 – 1.36 (m, 4H), 1.25 – 1.15 (m, 4H);  $^{13}\text{C}$  NMR (100 MHz,  $\text{CDCl}_3$ )  $\delta$  124.2 (olefin C, 2C), 111.3 (ketal C), 75.8 (Bridge head C-Br, 2C),

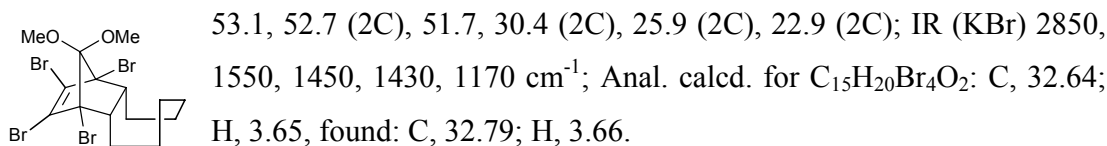

Compound **4b**: yield 96%; yellow solid; mp 114 – 116 °C;  $^1\text{H}$  NMR (400 MHz,  $\text{CDCl}_3$ )  $\delta$

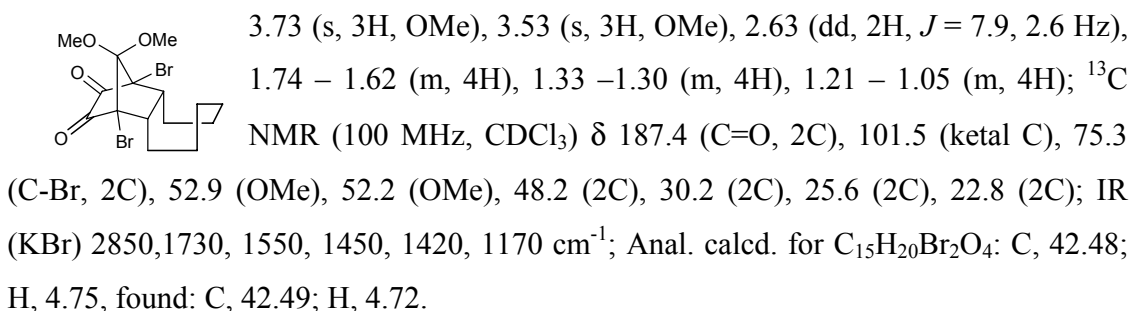

General procedure for the preparation of compounds **4a** and **10a**

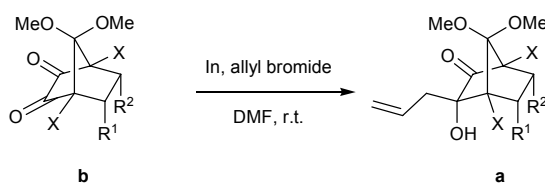

A mixture of diketone **b** (1 mmol), indium metal (2 mmol, cut into small pieces) and allyl bromide (4 mmol) in DMF (1.2 mL) was stirred at room temperature for 6h. After completion of the reaction, as monitored by tlc, the reaction was quenched with few drops of 10% HCl (saturated  $\text{NH}_4\text{Cl}$  was used for acid sensitive substrate **10b**) and extracted with diethyl ether (5x5 mL). The combined organic layers were washed with brine, dried over anhyd.  $\text{Na}_2\text{SO}_4$  and concentrated. The resulting residue was purified by silica gel column chromatography to provide the pure homoallylic alcohols.

Compound **4a**: yield 84%; white solid; mp 82 – 84 °C;  $^1\text{H}$  NMR (400 MHz,  $\text{CDCl}_3$ )  $\delta$

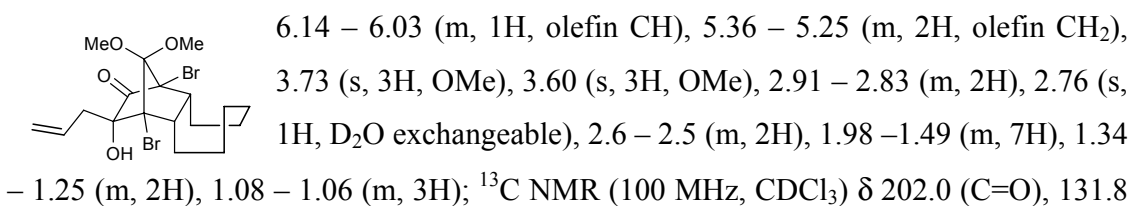

(olefin CH), 122.7 (olefin CH<sub>2</sub>), 102.7 (ketal C), 80.9 (C-OH), 76.0 (C-Br), 73.9 (C-Br), 52.2, 51.6, 50.6, 49.5, 43.4, 31.6, 30.8, 25.7, 24.9, 24.4, 22.0; IR (KBr) 2850, 1760, 1450, 1430, 1180 cm<sup>-1</sup>; Anal. calcd. for C<sub>18</sub>H<sub>26</sub>Br<sub>2</sub>O<sub>4</sub>: C, 46.37; H, 5.62, found: C, 46.49; H, 5.77.

Compound **10a**: yield 80%; white solid; mp 176 – 177 °C; <sup>1</sup>H NMR (400 MHz, CDCl<sub>3</sub>) δ

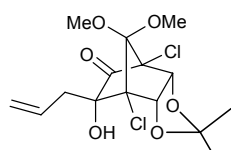

6.13 – 6.06 (m, 1H, olefin CH), 6.04 (s, 1H, D<sub>2</sub>O exchangeable), 5.11 – 5.03 (m, 3H), 4.72 (d, 1H, *J* = 8.1 Hz), 3.57 (s, 3H, OMe), 3.55 (s, 3H, OMe), 2.74 (d, 2H, *J* = 7.1 Hz), 1.48 (s, 3H, Me), 1.31 (s, 3H, Me); <sup>13</sup>C

NMR (100 MHz, CDCl<sub>3</sub>) δ 198.4 (C=O), 131.9 (olefin CH), 118.1 (olefin CH<sub>2</sub>), 115.4 (ketal C), 105.0 (ketal C), 86.3, 83.0, 80.5, 71.9, 51.8 (OMe), 51.3 (OMe), 40.6, 25.1, 23.1; IR (KBr) 2850, 1770, 1450, 1430, 1180 cm<sup>-1</sup>; Anal. calcd. for C<sub>15</sub>H<sub>20</sub>Cl<sub>2</sub>O<sub>6</sub>: C, 49.06; H, 5.49; found: C, 49.14; H, 5.61.

Spectral and analytical data for compounds **c** and **d**:

Compound **1c**: white solid; mp 82 – 84 °C; <sup>1</sup>H NMR (400 MHz, CDCl<sub>3</sub>) δ 4.18 – 4.14 (m, 2H), 3.99 – 3.96 (m, 1H), 3.71 (s, 3H, OMe), 3.62 (s, 3H, OMe), 3.54 – 3.50 (m, 1H), 3.34 (s, 3H, OMe), 2.99 – 2.97 (m, 1H), 2.55 – 2.50 (m, 3H), 1.84 –

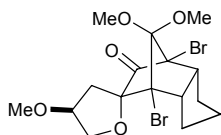

1.70 (m, 2H), 1.62 – 1.52 (m, 2H), 1.42 – 1.38 (m, 1H); <sup>13</sup>C NMR (100 MHz, CDCl<sub>3</sub>) δ 204.7 (C=O), 105.8 (ketal C), 92.0, 79.7, 73.3, 72.9 (C-Br), 69.1 (C-Br), 57.1 (OMe), 54.1, 51.8, 51.5, 50.7, 43.0,

26.1, 26.0, 25.5; IR (KBr) 2850, 1760, 1440, 1180, 1050 cm<sup>-1</sup>; Anal. calcd. for C<sub>16</sub>H<sub>22</sub>Br<sub>2</sub>O<sub>5</sub>: C, 42.31; H, 4.88, found: C, 42.57; H, 4.88; ESI-HRMS: calcd. for C<sub>16</sub>H<sub>22</sub>Br<sub>2</sub>O<sub>5</sub>+H 452.9913, found 452.9918.

Compound **1d**: white crystals (CH<sub>2</sub>Cl<sub>2</sub> / Hexane); mp 126 – 128 °C; <sup>1</sup>H NMR (400 MHz, CDCl<sub>3</sub>) δ 4.12 (dd, 1H, *J* = 8.3, 4.6 Hz), 4.09 – 4.02 (m, 2H), 3.70 (s, 3H, OMe), 3.62 (s, 3H, OMe), 3.47 – 3.42 (m, 1H), 3.33 (s, 3H, OMe), 3.10 – 2.98 (m, 1H), 2.77 (dd, 1H, *J* = 14.6, 6.8 Hz), 2.48 – 2.46 (m, 1H), 2.30 (dd, 1H, 14.6, 3.4 Hz), 1.89 – 1.85 (m, 1H), 1.73

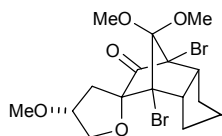

– 1.69 (m, 2H), 1.59 – 1.43 (m, 2H);  $^{13}\text{C}$  NMR (100 MHz,  $\text{CDCl}_3$ )  $\delta$  202.9 (C=O), 105.7 (ketal C), 92.0, 79.7, 73.8, 72.8 (C-Br), 69.9 (C-Br), 57.1 (OMe), 53.8, 51.9, 51.5, 50.8, 43.6, 26.0, 25.9, 25.4; IR (KBr) 2850, 1760, 1440, 1200, 1060, 960  $\text{cm}^{-1}$ ; Anal. calcd. for  $\text{C}_{16}\text{H}_{22}\text{Br}_2\text{O}_5$ : C, 42.31; H, 4.88, found: C, 42.39; H, 4.94.

Compound **2c**: white solid; mp 81 – 82  $^\circ\text{C}$ ;  $^1\text{H}$  NMR (400 MHz,  $\text{CDCl}_3$ )  $\delta$  4.14 – 4.09 (m, 2H), 3.98 – 3.94 (m, 1H), 3.67 (s, 3H, OMe), 3.58 (s, 3H, OMe), 3.29 (s, 3H, OMe), 3.0 (dt, 1H,  $J = 12.0, 6.5$  Hz), 2.55 – 2.37 (m, 3H), 2.28 – 2.19 (m, 1H), 1.67 – 1.62 (m, 2H),

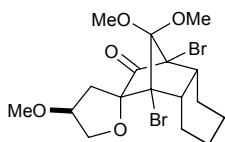

1.61 – 1.49 (m, 2H), 1.39 – 1.30 (m, 1H), 1.22 – 1.04 (m, 2H);  $^{13}\text{C}$  NMR (100 MHz,  $\text{CDCl}_3$ )  $\delta$  204.0 (C=O), 103.2 (ketal C), 92.1, 80.0, 74.4 (C-Br), 73.6, 71.0 (C-Br), 57.0 (OMe), 52.0 (OMe), 51.7 (OMe),

47.4, 43.6, 42.6, 20.3, 19.8, 19.7, 18.8; IR (KBr) 2850, 1760, 1440, 1180, 1060, 940  $\text{cm}^{-1}$ ; Anal. calcd. for  $\text{C}_{17}\text{H}_{24}\text{Br}_2\text{O}_5$ : C, 43.61; H, 5.17, found: C, 43.44; H, 5.13; ESI-HRMS: calcd. for  $\text{C}_{17}\text{H}_{24}\text{Br}_2\text{O}_5+\text{H}$  467.0069, found 467.0068.

Compound **2d**: white solid; mp 108 – 109  $^\circ\text{C}$ ;  $^1\text{H}$  NMR (400 MHz,  $\text{CDCl}_3$ )  $\delta$  4.12 – 4.04 (m, 2H), 3.96 (dd, 1H,  $J = 8.2, 3.8$  Hz), 3.70 (s, 3H, OMe), 3.59 (s, 3H, OMe), 3.32 (s, 3H, OMe), 2.98 (dt, 1H,  $J = 12.0, 6.6$  Hz), 2.79 (dd, 1H,  $J = 14.4, 6.8$  Hz), 2.47 (ddd, 1H,

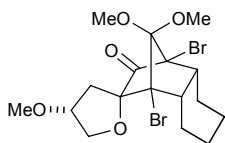

$J = 14.2, 12.4, 4.6$  Hz), 2.29 – 2.19 (m, 2H), 1.67 – 1.60 (m, 2H), 1.58 – 1.50 (m, 2H), 1.41 – 1.33 (m, 1H), 1.22 – 1.09 (m, 2H);  $^{13}\text{C}$  NMR (100 MHz,  $\text{CDCl}_3$ )  $\delta$  202.3 (C=O), 103.1 (ketal C), 92.2, 79.6, 74.3

(C-Br), 73.7, 71.9 (C-Br), 57.2 (OMe), 52.0 (OMe), 51.8 (OMe), 47.0, 43.9, 43.4, 20.3, 19.9, 19.6, 18.6; IR (KBr) 2850, 1760, 1440, 1180, 1060, 940  $\text{cm}^{-1}$ ; Anal. calcd. for  $\text{C}_{17}\text{H}_{24}\text{Br}_2\text{O}_5$ : C, 43.61; H, 5.17, found: C, 43.69; H, 5.41.

Compound **3c**: white solid; mp 94 – 96  $^\circ\text{C}$ ;  $^1\text{H}$  NMR (400 MHz,  $\text{CDCl}_3$ )  $\delta$  4.19 – 4.12 (m, 2H), 3.98 – 3.96 (m, 1H), 3.74 (s, 3H, OMe), 3.62 (s, 3H, OMe), 3.32 (s, 3H, OMe), 3.07 (dd, 1H,  $J = 12.4, 8.2$  Hz), 2.56 – 2.52 (m, 2H), 2.44 – 2.41 (m, 1H), 2.14 – 1.97 (m, 4H), 1.79 – 1.71 (m, 2H), 1.2 – 0.97 (m, 4H);  $^{13}\text{C}$  NMR (100 MHz,  $\text{CDCl}_3$ )  $\delta$  203.6 (C=O), 102.8 (ketal C), 92.2, 80.1, 75.4 (C-Br), 73.6, 72.2 (C-Br), 57.0 (OMe), 52.1, 51.7, 51.6,

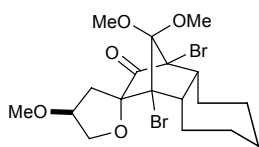

49.2, 42.6, 30.6, 30.5, 29.1, 25.7, 25.1; IR (KBr) 2850, 1760, 1440, 1180, 1060  $\text{cm}^{-1}$ ; Anal. calcd. for  $\text{C}_{18}\text{H}_{26}\text{Br}_2\text{O}_5$ : C, 44.83; H, 5.43, found: C, 44.89; H, 5.41.

Compound **3d**: white solid; mp 88 – 89 °C;  $^1\text{H}$  NMR (400 MHz,  $\text{CDCl}_3$ )  $\delta$  4.11 – 4.06 (m, 2H), 3.99 – 3.96 (m, 1H), 3.72 (s, 3H, OMe), 3.61 (s, 3H, OMe), 3.33 (s, 3H, OMe),

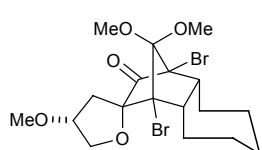

3.04 – 2.98 (m, 1H, ), 2.81 (dd, 1H,  $J = 14.5, 7.4$  Hz), 2.52 (dt, 1H,  $J = 12.3, 1.9$  Hz), 2.23 (dd, 1H,  $J = 14.3, 4.3$  Hz), 2.17 – 2.14 (m, 1H), 2.0 – 1.96 (m, 3H), 1.79 – 1.70 (m, 2H), 1.21 – 0.95 (m, 4H);  $^{13}\text{C}$  NMR (100 MHz,  $\text{CDCl}_3$ )  $\delta$  201.8 (C=O), 102.8 (ketal C), 92.4, 79.7, 75.2 (C-Br), 73.7, 73.1 (C-Br), 57.2 (OMe), 52.1, 51.7, 51.3, 49.5, 43.4, 30.6, 30.5, 29.1, 25.4, 25.0; IR (KBr) 2850, 1760, 1430, 1180, 1050, 980, 930  $\text{cm}^{-1}$ ; Anal. calcd. for  $\text{C}_{18}\text{H}_{26}\text{Br}_2\text{O}_5$ : C, 44.83; H, 5.43, found: C, 44.85; H, 5.41.

Compound **4c**: colorless viscous liquid;  $^1\text{H}$  NMR (400 MHz,  $\text{CDCl}_3$ )  $\delta$  4.18 – 4.11 (m, 1H), 4.08 – 4.03 (m, 1H), 3.92 – 3.89 (m, 1H), 3.71 (s, 3H, OMe), 3.56 (s, 3H, OMe), 3.28 (s, 3H, OMe), 2.85 – 2.79 (m, 1H), 2.52 – 2.44 (m, 2H), 2.34

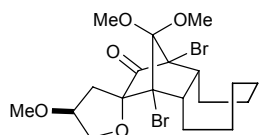

(dd, 1H,  $J = 14.2, 6.6$  Hz), 1.93 – 1.75 (m, 3H), 1.69 – 1.65 (m, 2H), 1.59 – 1.47 (m, 2H), 1.36 – 1.23 (m, 2H), 1.12 – 1.01 (m, 3H);  $^{13}\text{C}$  NMR (100 MHz,  $\text{CDCl}_3$ )  $\delta$  203.1 (C=O), 102.3 (ketal C), 91.6, 80.3, 76.2 (C-Br), 73.5, 73.3 (C-Br), 56.9 (OMe), 52.1, 51.7, 50.0, 49.0, 42.1, 31.4, 30.6, 25.7, 24.9, 24.4, 21.6; IR (neat) 2850, 1750, 1440, 1240, 1180, 1060, 940  $\text{cm}^{-1}$ ; Anal. calcd. for  $\text{C}_{19}\text{H}_{28}\text{Br}_2\text{O}_5$ : C, 45.99; H, 5.69, found: C, 45.76; H, 5.69.

Compound **4d**: white solid; 110 – 112 °C;  $^1\text{H}$  NMR (400 MHz,  $\text{CDCl}_3$ )  $\delta$  4.10 – 4.02 (m, 2H), 3.95 – 3.90 (m, 1H), 3.71 (s, 3H, OMe), 3.57 (s, 3H, OMe),

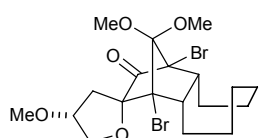

3.30 (s, 3H, OMe), 2.80 - 2.71 (m, 2H), 2.54 – 2.48 (m, 1H), 2.18 (dd, 1H,  $J = 14.5, 4.6$  Hz), 2.04 – 1.79 (m, 3H), 1.72 – 1.61 (m, 2H), 1.57 – 1.46 (m, 2H), 1.39 – 1.22 (m, 2H), 1.12 - 1.02 (m, 3H);  $^{13}\text{C}$  NMR (100 MHz,  $\text{CDCl}_3$ )  $\delta$  201.4 (C=O), 102.3 (ketal C), 91.8, 79.9, 76.1 (C-Br), 74.5 (C-Br), 73.8, 57.2 (OMe), 52.1, 51.8, 49.6, 49.5, 43.1, 31.4, 30.7, 25.7, 24.9, 24.4, 21.5; IR (KBr) 2860,

1770, 1440, 1180, 1080  $\text{cm}^{-1}$ ; Anal. calcd. for  $\text{C}_{19}\text{H}_{28}\text{Br}_2\text{O}_5$ : C, 45.99; H, 5.69, found: C, 45.86; H, 5.71.

Compound **5c**: colorless solid; mp 90 – 92  $^\circ\text{C}$ ;  $^1\text{H}$  NMR (400 MHz,  $\text{CDCl}_3$ )  $\delta$  7.35 – 7.26

(m, 5H), 4.34 – 4.28 (m, 2H), 4.09 (dd, 1H,  $J = 9.0, 3.4$  Hz), 3.81 (s, 3H, OMe), 3.74 – 3.68 (m, 1H, buried under OMe peak), 3.68 (s, 3H, OMe), 3.37 (s, 3H, OMe), 3.16 (dd, 1H,  $J = 13.0, 5.7$  Hz), 2.92 (t, 1H,  $J = 12.7$  Hz), 2.51 – 2.48 (m, 2H);  $^{13}\text{C}$  NMR (100 MHz,  $\text{CDCl}_3$ )  $\delta$

202.4 (C=O), 136.0 (Aromatic C), 129.4 (Aromatic CH, 2C), 128.1 (Aromatic CH, 2C), 127.8 (Aromatic CH), 103.6 (ketal C), 89.9, 80.9, 76.4, 73.1, 66.9, 57.3 (OMe), 52.0 (OMe), 51.9 (OMe), 49.7, 40.6, 39.6; IR (KBr) 2850, 1750, 1480, 1430, 1200  $\text{cm}^{-1}$ ; Anal. calcd. for  $\text{C}_{19}\text{H}_{22}\text{Br}_2\text{O}_5$ : C, 46.55; H, 4.52, found: C, 46.66; H, 4.71.

Compound **5d**: colorless solid; mp 98 – 99  $^\circ\text{C}$ ;  $^1\text{H}$  NMR (400 MHz,  $\text{CDCl}_3$ )  $\delta$  7.35 – 7.23

(m, 5H), 4.28 (dd, 1H,  $J = 8.5, 5.4$  Hz), 4.25 – 4.19 (m, 1H), 4.13 (dd, 1H,  $J = 8.6, 4.6$  Hz), 3.81 (s, 3H, OMe), 3.78 – 3.69 (m, 1H, buried under OMe peak), 3.69 (s, 3H, OMe), 3.37 (s, 3H, OMe), 3.11 (dd, 1H,  $J = 12.9, 5.6$  Hz), 2.86 (t, 1H,  $J = 12.7$  Hz), 2.78 (dd, 1H,  $J = 14.2, 7.1$  Hz), 2.3 (dd, 1H,  $J = 14.2, 4.6$  Hz);  $^{13}\text{C}$  NMR (100 MHz,  $\text{CDCl}_3$ )  $\delta$  201.1 (C=O), 135.9 (Aromatic C), 129.6 (Aromatic CH, 2C), 128.2 (Aromatic CH, 2C), 127.7 (Aromatic CH), 103.6 (ketal C), 89.9, 80.2, 76.4, 73.9, 67.9, 57.4 (OMe), 52.0 (OMe), 51.9 (OMe), 49.7, 41.1, 39.1; IR (KBr) 2850, 1750, 1480, 1430, 1200  $\text{cm}^{-1}$ ; Anal. calcd. for  $\text{C}_{19}\text{H}_{22}\text{Br}_2\text{O}_5$ : C, 46.55; H, 4.52, found: C, 46.57; H, 4.59.

Compound **6c** : white crystals ( $\text{CH}_2\text{Cl}_2$  / Hexane); mp 87 – 88  $^\circ\text{C}$ ;  $^1\text{H}$  NMR (400 MHz,

$\text{CDCl}_3$ )  $\delta$  4.11 – 4.04 (m, 2H), 3.95 – 3.91 (m, 1H), 3.62 (s, 3H, OMe), 3.50 (s, 3H, OMe), 3.26 (s, 3H, OMe), 2.93 (td, 1H,  $J = 11.2, 7.0$  Hz), 2.54 – 2.49 (m, 1H), 2.43 – 2.29 (m, 2H), 2.23 – 2.19 (m, 1H), 1.65 – 1.60 (m, 2H), 1.55 – 1.46 (m, 2H), 1.39 – 1.31 (m, 1H), 1.14 – 1.03 (m, 2H);  $^{13}\text{C}$  NMR (100 MHz,  $\text{CDCl}_3$ )  $\delta$  204.6 (C=O), 103.3 (ketal C), 91.9, 80.5 (C-Cl), 80.1, 76.0 (C-Cl), 73.7, 57.0 (OMe), 51.9 (OMe), 51.6 (OMe), 45.4, 42.3, 40.5, 20.2, 20.0,

19.4, 18.3; IR (KBr) 2850, 1760, 1440, 1180, 1060  $\text{cm}^{-1}$ ; Anal. calcd. for  $\text{C}_{17}\text{H}_{24}\text{Cl}_2\text{O}_5$ : C, 53.83; H, 6.38, found: C, 53.79; H, 6.55; ESI-HRMS: calcd. for  $\text{C}_{17}\text{H}_{24}\text{Cl}_2\text{O}_5+\text{H}$  379.1079, found 379.1073.

Compound **6d**: colorless liquid;  $^1\text{H}$  NMR (400 MHz,  $\text{CDCl}_3$ )  $\delta$  4.09 – 4.04 (m, 2H), 4.0 –

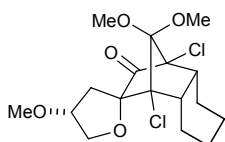

3.97 (m, 1H), 3.67 (s, 3H, OMe), 3.56 (s, 3H, OMe), 3.34 (s, 3H, OMe), 2.98 – 2.91 (m, 1H), 2.87 – 2.82 (m, 1H), 2.52 – 2.43 (m, 1H), 2.29 – 2.20 (m, 1H), 2.21 (dd, 1H,  $J = 14.4, 4.2$  Hz), 1.73 – 1.67 (m, 2H), 1.59 – 1.53 (m, 2H), 1.42 – 1.32 (m, 1H), 1.27 – 1.09 (m, 2H);

$^{13}\text{C}$  NMR (100 MHz,  $\text{CDCl}_3$ )  $\delta$  202.5 (C=O), 103.1 (ketal C), 91.9, 80.4 (C-Cl), 79.8, 76.8 (C-Cl), 73.7, 57.2 (OMe), 51.8 (OMe), 51.6 (OMe), 44.8, 42.5, 41.3, 20.2, 19.9, 19.2, 18.0; IR (neat) 2850, 1740, 1440, 1200, 1060, 960  $\text{cm}^{-1}$ ; Anal. calcd. for  $\text{C}_{17}\text{H}_{24}\text{Cl}_2\text{O}_5$ : C, 53.83; H, 6.38, found: C, 53.85; H, 6.63.

Compound **7c**: colorless viscous liquid;  $^1\text{H}$  NMR (400 MHz,  $\text{CDCl}_3$ )  $\delta$  4.13 – 4.10 (m, 1H), 4.04 (dd, 1H,  $J = 9.3, 4.8$  Hz), 3.91 – 3.88 (m, 1H), 3.66 (s, 3H, OMe), 3.51 (s, 3H, OMe), 3.28 (s, 3H, OMe), 2.79 – 2.72 (m, 1H), 2.50 – 2.45 (m, 2H),

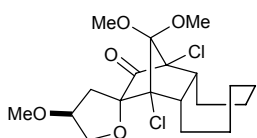

2.29 (dd, 1H,  $J = 14.4, 6.8$  Hz), 1.89 – 1.81 (m, 3H), 1.70 – 1.67 (m, 2H), 1.58 – 1.50 (m, 2H), 1.32 – 1.25 (m, 2H), 1.09 – 1.03 (m, 3H);  $^{13}\text{C}$  NMR (100 MHz,  $\text{CDCl}_3$ )  $\delta$  203.7 (C=O), 102.4 (ketal C), 91.3, 81.1 (C-Cl), 80.3, 77.2 (C-Cl), 73.6, 56.9 (OMe), 51.9 (OMe), 51.5 (OMe), 48.6, 48.3, 39.9, 31.4, 30.6, 25.7, 25.0, 23.8, 20.7; IR (neat) 2850, 1770, 1440, 1200, 1050, 960  $\text{cm}^{-1}$ ; Anal. calcd. for  $\text{C}_{19}\text{H}_{28}\text{Cl}_2\text{O}_5$ : C, 56.02; H, 6.93, found: C, 55.89; H, 6.77.

Compound **7d**: white solid; mp 104 – 105  $^\circ\text{C}$ ;  $^1\text{H}$  NMR (400 MHz,  $\text{CDCl}_3$ )  $\delta$  4.07 – 4.02 (m, 1H), 3.99 (dd, 1H,  $J = 9.0, 5.4$  Hz), 3.66 (dd, 1H,  $J = 9.0, 4.4$  Hz), 3.66 (s, 3H, OMe),

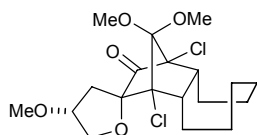

3.52 (s, 3H, OMe), 3.31 (s, 3H, OMe), 2.77 (dd, 1H,  $J = 14.4, 7.1$  Hz), 2.72 – 2.67 (m, 1H), 2.49 – 2.44 (m, 1H), 2.14 (dd, 1H,  $J = 14.4, 4.6$  Hz), 1.99 – 1.95 (m, 1H), 1.81 – 1.67 (m, 4H), 1.58 –

1.46 (m, 2H), 1.38 – 1.22 (m, 2H), 1.12 – 1.02 (m, 3H);  $^{13}\text{C}$  NMR (100 MHz,  $\text{CDCl}_3$ )  $\delta$  201.8 (C=O), 102.3 (ketal C), 91.5, 81.2 (C-Cl), 80.1, 78.4 (C-Cl), 73.9, 57.1 (OMe),



51.9 (OMe), 51.6 (OMe), 48.6, 48.2, 40.9, 31.4, 30.6, 25.7, 25.0, 23.8, 20.5; IR (KBr) 2850, 1770, 1440, 1200, 1050, 960  $\text{cm}^{-1}$ ; Anal. calcd. for  $\text{C}_{19}\text{H}_{28}\text{Cl}_2\text{O}_5$ : C, 56.02; H, 6.93, found: C, 56.12; H, 6.84.

Compound **8c**: colorless viscous liquid;  $^1\text{H}$  NMR (400 MHz,  $\text{CDCl}_3$ )  $\delta$  4.48 – 4.39 (m, 2H), 4.18 – 4.07 (m, 3H), 4.02 – 3.96 (m, 2H), 3.66 (s, 3H, OMe), 3.53 (s, 3H, OMe),

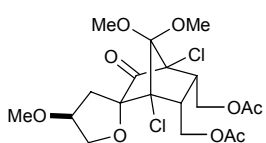 3.31 – 3.25 (m, 1H, buried under OMe peak), 3.26 (s, 3H, OMe), 2.99 – 2.95 (m, 1H), 2.48 – 2.43 (m, 1H), 2.31 (dd, 1H,  $J = 14.4$ , 6.6 Hz), 2.01 (s, 3H, Me), 1.95 (s, 3H, Me);  $^{13}\text{C}$  NMR (100 MHz,  $\text{CDCl}_3$ )  $\delta$  202.2 (C=O), 170.4 (O-C=O), 170.1 (O-C=O), 102.2 (ketal C), 90.8, 80.4, 77.9 (C-Cl), 75.5 (C-Cl), 73.7, 60.9, 59.7, 56.9 (OMe), 52.1 (OMe), 51.9 (OMe), 46.4, 43.0, 39.4, 20.9, 20.5; IR (neat) 2850, 1760 – 1720 (broad), 1440, 1350, 1200, 1020  $\text{cm}^{-1}$ ; Anal. calcd. for  $\text{C}_{19}\text{H}_{26}\text{Cl}_2\text{O}_9$ : C, 48.63; H, 5.58, found: C, 48.81; H, 5.76.

Compound **8d**: colorless viscous liquid;  $^1\text{H}$  NMR (400 MHz,  $\text{CDCl}_3$ )  $\delta$  4.47 – 4.41 (m, 2H), 4.22 – 4.10 (m, 2H), 4.08 – 4.01 (m, 2H), 3.89 – 3.86 (m, 1H), 3.67 (s, 3H, OMe), 3.54 (s, 3H, OMe), 3.32 (s, 3H, OMe), 3.26 – 3.2 (m, 1H), 3.01 – 2.97 (m, 1H), 2.75 –

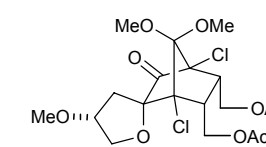 2.69 (m, 1H), 2.17 (dd, 1H,  $J = 14.2$ , 5.2 Hz), 2.03 (s, 3H, Me), 1.96 (s, 3H, Me);  $^{13}\text{C}$  NMR (100 MHz,  $\text{CDCl}_3$ )  $\delta$  200.6 (C=O), 170.5 (O-C=O), 170.1 (O-C=O), 102.0 (ketal C), 90.7, 80.2 (C-Cl), 79.6, 77.9 (C-Cl), 73.7, 60.7, 59.5 (OMe), 57.4, 52.0, 51.9, 46.1, 43.1, 39.9, 20.9, 20.5; IR (neat) 2850, 1770 – 1720 (broad), 1440, 1350, 1200, 1020  $\text{cm}^{-1}$ ; Anal. calcd. for  $\text{C}_{19}\text{H}_{26}\text{Cl}_2\text{O}_9$ : C, 48.63; H, 5.58, found: C, 48.68; H, 5.61.

Compound **9c**: white solid; mp 120 – 122  $^\circ\text{C}$ ;  $^1\text{H}$  NMR (400 MHz,  $\text{CDCl}_3$ )  $\delta$  7.34 – 7.25 (m, 5H), 4.32 – 4.23 (m, 2H), 4.11 – 4.08 (m, 1H), 3.77 (s, 3H, OMe), 3.7 (dd, 1H,  $J =$

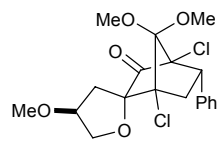 12.6, 5.8 Hz), 3.64 (s, 3H, OMe), 3.36 (s, 3H, OMe), 3.08 (dd, 1H,  $J =$  13.1, 5.8 Hz), 2.8 (t, 1H,  $J = 12.8$  Hz), 2.57 – 2.54 (m, 1H), 2.42 (dd, 1H,  $J = 14.0$ , 6.7 Hz);  $^{13}\text{C}$  NMR (100 MHz,  $\text{CDCl}_3$ )  $\delta$  203.1 (C=O), 135.5 (Aromatic C), 129.3 (Aromatic CH, 2C), 128.2 (Aromatic CH, 2C), 127.8 (Aromatic CH), 103.4 (ketal C), 89.5, 82.0 (C-Cl), 80.8, 73.2, 73.0 (C-Cl), 57.1 (OMe),

51.8 (OMe), 51.7 (OMe), 48.3, 38.4, 37.2; IR (KBr) 2850, 1760, 1480, 1430, 1200  $\text{cm}^{-1}$ ;  
Anal. calcd. for  $\text{C}_{19}\text{H}_{22}\text{Cl}_2\text{O}_5$ : C, 56.87; H, 5.53, found: C, 57.06; H, 5.43.

Compound **9d**: colorless viscous liquid;  $^1\text{H}$  NMR (400 MHz,  $\text{CDCl}_3$ )  $\delta$  7.34 – 7.22 (m, 5H), 4.22 – 4.14 (m, 2H), 4.11 – 4.08 (m, 1H), 3.75 (s, 3H, OMe), 3.71 – 3.64 (m, 1H,

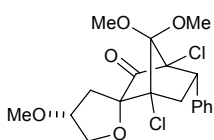

partially buried under OMe peak), 3.62 (s, 3H, OMe), 3.35 (s, 3H, OMe), 3.0 (dd, 1H,  $J = 12.9, 5.6$  Hz), 2.81 – 2.70 (m, 2H), 2.24 (dd, 1H,  $J = 14.3, 4.1$  Hz);  $^{13}\text{C}$  NMR (100 MHz,  $\text{CDCl}_3$ )  $\delta$  201.4 (C=O), 135.5 (Aromatic C), 129.5 (Aromatic CH, 2C), 128.3 (Aromatic CH, 2C), 127.7 (Aromatic CH), 103.4 (ketal C), 89.6, 82.1, 80.3, 74.01, 73.96, 57.3 (OMe), 51.86 (OMe), 51.81 (OMe), 48.4, 39.0, 36.9; IR (neat) 2850, 1770, 1480, 1430, 1200  $\text{cm}^{-1}$ ;  
Anal. calcd. for  $\text{C}_{19}\text{H}_{22}\text{Cl}_2\text{O}_5$ : C, 56.87; H, 5.53, found: C, 56.89; H, 5.51.

Compound **10c**: white crystals ( $\text{CH}_2\text{Cl}_2$  / Hexane); mp 124 – 125  $^\circ\text{C}$ ;  $^1\text{H}$  NMR (400 MHz,

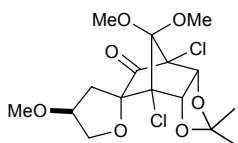

$\text{CDCl}_3$ )  $\delta$  5.08 (d, 1H,  $J = 8.3$  Hz), 4.75 (d, 1H,  $J = 8.3$  Hz), 4.17 – 4.13 (m, 2H), 4.03 – 4.02 (m, 1H), 3.63 (s, 3H, OMe), 3.56 (s, 3H, OMe), 3.29 (s, 3H, OMe), 2.49 – 2.47 (m, 2H), 1.5 (s, 3H, Me), 1.3 (s, 3H, Me);  $^{13}\text{C}$  NMR (100 MHz,  $\text{CDCl}_3$ )  $\delta$  200.7 (C=O), 115.5 (ketal C), 105.2 (ketal C), 90.8, 84.1, 81.0, 79.2, 78.0 (C-Cl), 73.6 (C-Cl), 73.0, 57.2 (OMe), 52.1 (OMe), 51.5 (OMe), 41.6, 24.9, 24.5; IR (KBr) 2850, 1770, 1440, 1360, 1250, 1180, 1110  $\text{cm}^{-1}$ ; Anal. calcd. for  $\text{C}_{16}\text{H}_{22}\text{Cl}_2\text{O}_7$ : C, 48.38; H, 5.58, found: C, 48.49; H, 5.67.

Compound **10d**: white solid; mp 136 – 138  $^\circ\text{C}$ ;  $^1\text{H}$  NMR (400 MHz,  $\text{CDCl}_3$ )  $\delta$  5.05 (d,

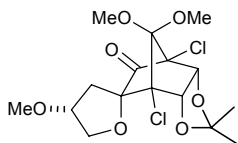

1H,  $J = 8.3$  Hz), 4.76 (d, 1H,  $J = 8.3$  Hz), 4.18 – 4.15 (m, 1H), 4.06 – 4.0 (m, 2H), 3.62 (s, 3H, OMe), 3.56 (s, 3H, OMe), 3.32 (s, 3H, OMe), 2.78 (dd, 1H,  $J = 14.4, 7.3$  Hz), 2.24 – 2.2 (m, 1H), 1.51 (s, 3H, Me), 1.29 (s, 3H, Me);  $^{13}\text{C}$  NMR (100 MHz,  $\text{CDCl}_3$ )  $\delta$  198.9 (C=O), 115.5 (ketal C), 105.2 (ketal C), 90.9, 83.9, 81.3, 79.3, 78.0 (C-Cl), 74.1 (C-Cl), 73.7, 57.4 (OMe), 52.1 (OMe), 51.6 (OMe), 41.7, 24.9, 24.5; IR (KBr) 2850, 1760, 1440, 1360, 1260, 1180  $\text{cm}^{-1}$ ;  
Anal. calcd. for  $\text{C}_{16}\text{H}_{22}\text{Cl}_2\text{O}_7$ : C, 48.38; H, 5.58, found: C, 48.42; H, 5.59.

Compound **11c**: colorless liquid;  $^1\text{H}$  NMR (400 MHz,  $\text{CDCl}_3$ )  $\delta$  4.24 – 4.22 (m, 1H), 4.05 (dd, 1H,  $J = 9.6, 4.8$  Hz), 3.98 – 3.95 (m, 1H), 3.7 (s, 3H, OMe), 3.69 (s, 3H, OMe), 3.55

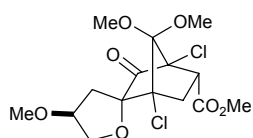

(s, 3H, OMe), 3.41 (dd, 1H,  $J = 12.8, 4.8$  Hz) 3.3 (s, 3H, OMe), 2.95 (dd, 1H,  $J = 12.5, 4.8$  Hz), 2.65 (t, 1H,  $J = 12.7$  Hz), 2.42 – 2.35 (m, 2H);  $^{13}\text{C}$  NMR (100 MHz,  $\text{CDCl}_3$ )  $\delta$  200.4 (C=O), 170.0 (O=C-O), 102.9 (ketal C), 89.2, 81.1, 77.4 (C-Cl), 73.3, 72.4 (C-Cl), 57.0 (OMe), 52.5 (OMe), 51.92 (OMe), 51.87 (OMe), 47.1, 38.1, 34.1; IR (neat) 2850, 1760, 1750, 1430, 1350, 1290  $\text{cm}^{-1}$ ; Anal. calcd. for  $\text{C}_{15}\text{H}_{20}\text{Cl}_2\text{O}_7$ : C, 47.01; H, 5.26, found: C, 46.94; H, 5.28.

Compound **11d**: colorless liquid;  $^1\text{H}$  NMR (400 MHz,  $\text{CDCl}_3$ )  $\delta$  4.13 – 4.06 (m, 2H), 3.94 – 3.89 (m, 1H), 3.67 (s, 3H, OMe), 3.66 (s, 3H, OMe), 3.55 (s, 3H, OMe), 3.39 (dd,

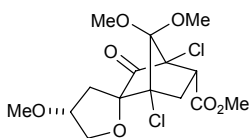

1H,  $J = 12.8, 4.8$  Hz), 3.33 (s, 3H, OMe), 2.91 (dd, 1H,  $J = 12.8, 4.9$  Hz), 2.71 – 2.66 (m, 1H), 2.58 (t, 1H,  $J = 12.7$  Hz), 2.27 – 2.22 (m, 1H);  $^{13}\text{C}$  NMR (100 MHz,  $\text{CDCl}_3$ )  $\delta$  199.1 (C=O), 169.9 (O=C-O), 102.9 (ketal C), 89.2, 80.0, 73.5, 73.3 (C-Cl), 57.4 (OMe), 52.5 (OMe), 52.0 (OMe), 51.9 (OMe), 47.0, 38.7, 33.5; IR (neat) 2850, 1770, 1750, 1430, 1350, 1290  $\text{cm}^{-1}$ ; Anal. calcd. for  $\text{C}_{15}\text{H}_{20}\text{Cl}_2\text{O}_7$ : C, 47.01; H, 5.26, found: C, 47.18; H, 5.36.

Compound **13c**: white crystals ( $\text{CH}_2\text{Cl}_2$  / Hexane); mp 86 – 88  $^\circ\text{C}$ ;  $^1\text{H}$  NMR (400 MHz,  $\text{CDCl}_3$ )  $\delta$  4.28 – 4.22 (m, 2H), 3.98 (dd, 1H,  $J = 10.0, 1.9$  Hz), 3.84 – 3.81 (m, 1H), 3.63

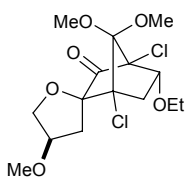

– 3.54 (m, 1H), 3.56 (s, 3H, OMe), 3.53 (s, 3H, OMe), 3.46 – 3.38 (m, 1H), 3.29 (s, 3H, OMe), 2.84 (dd, 1H,  $J = 13.4, 10.0$  Hz), 2.36 (dd, 1H,  $J = 13.0, 6.8$  Hz), 1.92 (dd, 1H,  $J = 13.0, 6.6$  Hz), 1.89 (dd, 1H,  $J = 13.4, 1.9$  Hz), 1.05 (t, 3H,  $J = 7.1$  Hz);  $^{13}\text{C}$  NMR (100 MHz,  $\text{CDCl}_3$ )  $\delta$  200.6 (C=O), 104.7 (ketal C), 88.4, 81.2 (C-Cl), 79.0, 78.1, 73.7, 71.4 (C-Cl), 66.3, 57.7 (OMe), 52.0, 51.3, 42.2, 36.2, 15.2; IR (KBr) 2850, 1760, 1440, 1180, 1100, 1060, 970  $\text{cm}^{-1}$ ; Anal. calcd. for  $\text{C}_{15}\text{H}_{22}\text{Cl}_2\text{O}_6$ : C, 48.79; H, 6.01, found: C, 48.76; H, 6.18.

Compound **13d**: colorless viscous liquid;  $^1\text{H}$  NMR (400 MHz,  $\text{CDCl}_3$ )  $\delta$  4.18 – 4.15 (m, 1H), 4.06 – 4.01 (m, 2H), 3.97 (dd, 1H,  $J = 9.8, 1.8$  Hz), 3.64 – 3.6 (m, 1H), 3.56 (s, 3H,

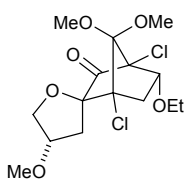

OMe), 3.53 (s, 3H, OMe), 3.43 – 3.37 (m, 1H), 3.27 (s, 3H, OMe), 2.83 (dd, 1H,  $J = 13.5, 10.0$  Hz), 2.28 – 2.24 (m, 1H), 2.15 – 2.09 (m, 1H), 1.91 (dd, 1H,  $J = 13.6, 1.8$  Hz), 1.04 (t, 3H,  $J = 7.1$  Hz);  $^{13}\text{C}$  NMR (100 MHz,  $\text{CDCl}_3$ )  $\delta$  198.7 (C=O), 104.7 (ketal C), 88.7, 81.5 (C-Cl), 80.1, 78.2, 75.3, 72.7 (C-Cl), 66.3, 56.7 (OMe), 52.0 (OMe), 51.3 (OMe), 41.9, 35.8, 15.2; IR (neat) 2850, 1760, 1440, 1250, 1100, 1080, 970  $\text{cm}^{-1}$ ; Anal. calcd. for  $\text{C}_{15}\text{H}_{22}\text{Cl}_2\text{O}_6$ : C, 48.79; H, 6.01, found: C, 48.88; H, 6.25.

Compound **14c**: white solid; mp 120 °C;  $^1\text{H}$  NMR (400 MHz,  $\text{CDCl}_3$ )  $\delta$  4.26 – 4.22 (m, 2H), 3.87 – 3.85 (m, 1H), 3.65 (s, 3H, OMe), 3.58 (s, 3H, OMe), 3.57 (s, 3H, OMe), 3.3

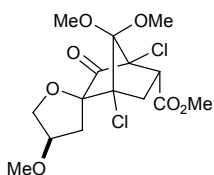

(s, 3 H, OMe), 3.25 (dd, 1H,  $J = 12.4, 4.8$  Hz), 2.71 (t, 1H,  $J = 3.6$  Hz), 2.69 – 2.65 (m, 1H), 2.17 (dd, 1H,  $J = 13.3, 4.7$  Hz), 2.0 (dd, 1H,  $J = 13.1, 5.8$  Hz);  $^{13}\text{C}$  NMR (100 MHz,  $\text{CDCl}_3$ )  $\delta$  201.9 (C=O), 171.4 (O=C-O), 104.7 (ketal C), 88.9, 79.3, 78.1 (C-Cl), 74.0, 71.1 (C-Cl), 57.6 (OMe), 52.8 (OMe), 52.4 (OMe), 51.1 (OMe), 46.1, 36.8, 35.8; IR (KBr) 2850, 1770, 1730, 1440, 1350, 1290  $\text{cm}^{-1}$ ; Anal. calcd. for  $\text{C}_{15}\text{H}_{20}\text{Cl}_2\text{O}_7$ : C, 47.01; H, 5.26, found: C, 47.05; H, 5.43.

Compound **14d**: white crystals ( $\text{CH}_2\text{Cl}_2$  / Hexane); mp 124 – 125 °C;  $^1\text{H}$  NMR (400 MHz,  $\text{CDCl}_3$ )  $\delta$  4.20 – 4.17 (m, 1H), 4.11 – 4.08 (m, 2H), 3.68 (s, 3H, OMe), 3.63 (s, 3H,

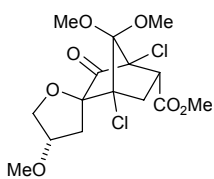

OMe), 3.60 (s, 3H, OMe), 3.33 (s, 3H, OMe), 3.28 (dd, 1H,  $J = 12.3, 4.8$  Hz), 2.69 (t, 1H,  $J = 12.9$  Hz), 2.63 (dd, 1H,  $J = 13.2, 2.2$  Hz), 2.28 – 2.22 (m, 2H);  $^{13}\text{C}$  NMR (100 MHz,  $\text{CDCl}_3$ )  $\delta$  199.9 (C=O), 171.3 (O=C-O), 104.6 (ketal C), 89.1, 80.0, 78.3 (C-Cl), 75.4, 72.4 (C-Cl), 56.7 (OMe), 52.8 (OMe), 52.3 (OMe), 51.1 (OMe), 46.1, 36.3, 35.3; IR (KBr) 2850, 1780, 1710, 1430, 1360, 1290  $\text{cm}^{-1}$ ; Anal. calcd. for  $\text{C}_{15}\text{H}_{20}\text{Cl}_2\text{O}_7$ : C, 47.01; H, 5.26, found: C, 47.26; H, 5.37.

**X-ray crystal structure of 1d:** White crystals ( $\text{CH}_2\text{Cl}_2$  / Hexane).  $\text{C}_{16}\text{H}_{22}\text{Br}_2\text{O}_5$ ,  $M_r = 454.16$ ,  $0.18 \times 0.15 \times 0.13 \text{ mm}^3$ , monoclinic, space group  $P121/n1$  with  $a = 8.9742(8) \text{ \AA}$ ,  $b = 17.9301(16) \text{ \AA}$ ,  $c = 10.6917(10) \text{ \AA}$ ,  $\alpha = 90^\circ$ ,  $\beta = 106.031(2)^\circ$ ,  $\gamma = 90^\circ$ ,  $V = 1653.5(3) \text{ \AA}^3$ ,  $Z = 4$ ,  $\rho_{\text{calcd.}} = 1.824 \text{ g cm}^{-3}$ ,  $F(000) = 912$ , Absorption coefficient =  $4.925 \text{ mm}^{-1}$ ,  $\text{MoK}\alpha$  radiation,  $\lambda = 0.71073 \text{ \AA}$ ,  $T = 100 \text{ K}$ , Number of measured and independent reflections =  $10726 / 4062$ ,  $R_{\text{int.}} = 0.0533$ ,  $R1 = 0.048$ ,  $wR2 = 0.0980$ , maximum and minimum residual electron density is  $1.512$  and  $-1.341 \text{ e\AA}^{-3}$ , respectively.

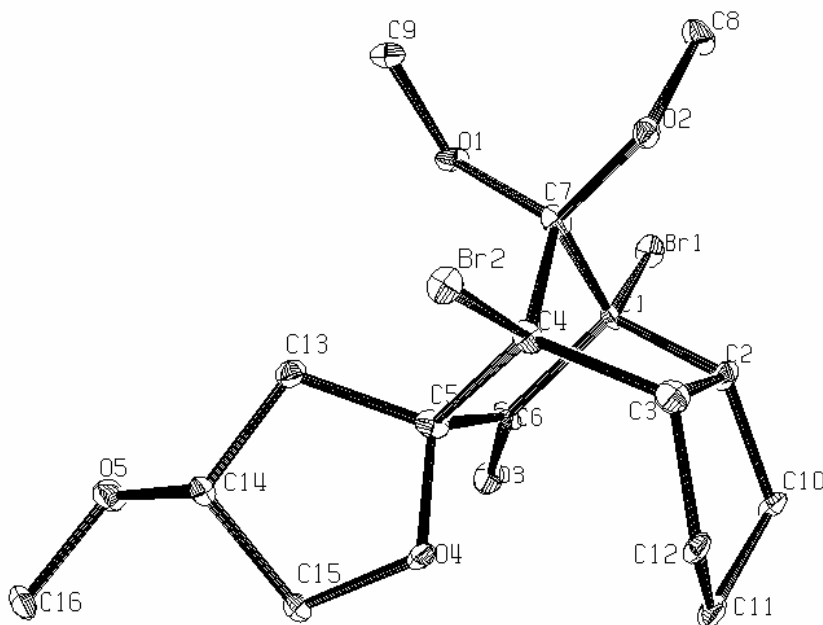

**Fig. S1** X-ray crystal structure of **1d** (ORTEP diagram). Displacement ellipsoids are drawn at 30% probability level for non-hydrogen atoms. Hydrogen atoms are omitted for clarity.

**X-ray crystal structure of 6c:** White crystals (CH<sub>2</sub>Cl<sub>2</sub> / Hexane). C<sub>17</sub>H<sub>24</sub>Cl<sub>2</sub>O<sub>5</sub>,  $M_r = 379.26$ ,  $0.18 \times 0.15 \times 0.13 \text{ mm}^3$ , orthorhombic, space group Pca21 with  $a = 11.5727(9) \text{ \AA}$ ,  $b = 11.7784(10) \text{ \AA}$ ,  $c = 25.579(2) \text{ \AA}$ ,  $\alpha = 90^\circ$ ,  $\beta = 90^\circ$ ,  $\gamma = 90^\circ$ ,  $V = 3486.6(5) \text{ \AA}^3$ ,  $Z = 8$ ,  $\rho_{\text{calcd.}} = 1.445 \text{ g cm}^{-3}$ ,  $F(000) = 1600$ , Absorption coefficient =  $0.397 \text{ mm}^{-1}$ , MoK $\alpha$  radiation,  $\lambda = 0.71073 \text{ \AA}$ ,  $T = 100 \text{ K}$ , Number of measured and independent reflections = 22182 / 7292,  $R_{\text{int.}} = 0.0482$ ,  $R1 = 0.0494$ ,  $wR2 = 0.1069$ , maximum and minimum residual electron density is 0.486 and  $-0.470 \text{ e\AA}^{-3}$ , respectively.

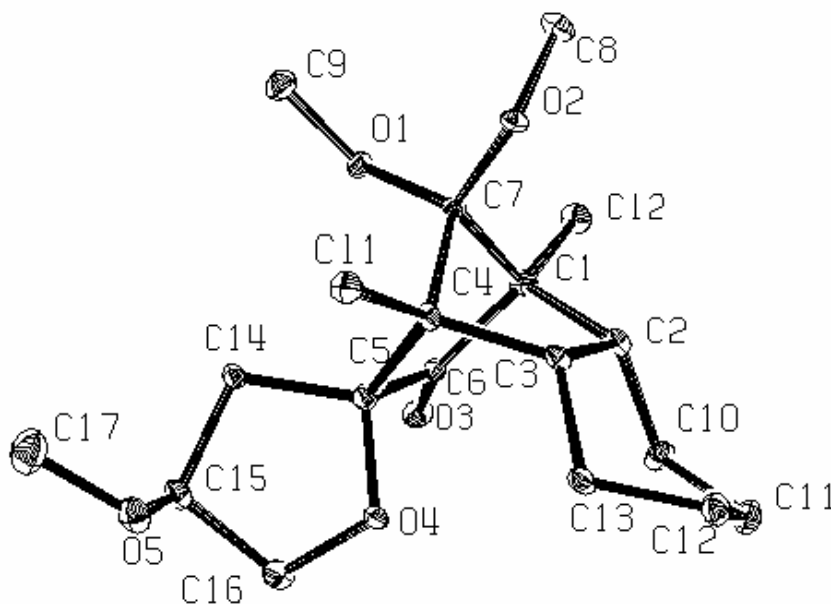

**Fig. S2** X-ray crystal structure of **6c** (ORTEP diagram). Displacement ellipsoids are drawn at 30% probability level for non-hydrogen atoms. Hydrogen atoms are omitted for clarity.

**X-ray crystal structure of 10c:** White crystals ( $\text{CH}_2\text{Cl}_2$  / Hexane).  $\text{C}_{16}\text{H}_{22}\text{Cl}_2\text{O}_7$ ,  $M_r = 397.24$ ,  $0.19 \times 0.07 \times 0.05 \text{ mm}^3$ , monoclinic, space group  $P121/c1$  with  $a = 8.2163 (7) \text{ \AA}$ ,  $b = 8.1296 (7) \text{ \AA}$ ,  $c = 26.697 (2) \text{ \AA}$ ,  $\alpha = 90^\circ$ ,  $\beta = 94.502 (2)^\circ$ ,  $\gamma = 90^\circ$ ,  $V = 1777.7 (3) \text{ \AA}^3$ ,  $Z = 4$ ,  $\rho_{\text{calcd.}} = 1.484 \text{ g cm}^{-3}$ ,  $F(000) = 832$ , Absorption coefficient =  $0.401 \text{ mm}^{-1}$ ,  $\text{MoK}\alpha$  radiation,  $\lambda = 0.71073 \text{ \AA}$ ,  $T = 100 \text{ K}$ , Number of measured and independent reflections =  $11386 / 4356$ ,  $R_{\text{int.}} = 0.0502$ ,  $R1 = 0.0595$ ,  $wR2 = 0.1500$ , maximum and minimum residual electron density is  $0.674$  and  $-0.685 \text{ e\AA}^{-3}$ , respectively.

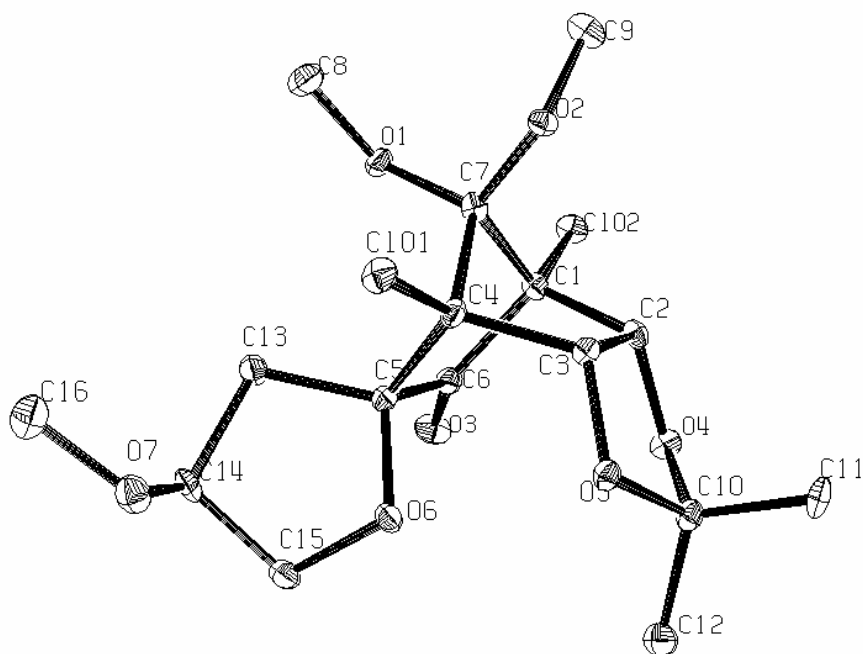

**Fig. S3** X-ray crystal structure of **10c** (ORTEP diagram). Displacement ellipsoids are drawn at 30% probability level for non-hydrogen atoms. Hydrogen atoms are omitted for clarity.

**X-ray crystal structure of 13c:** White crystals ( $\text{CH}_2\text{Cl}_2$  / Hexane).  $\text{C}_{15}\text{H}_{22}\text{Cl}_2\text{O}_6$ ,  $M_r = 369.23$ ,  $0.10 \times 0.08 \times 0.06 \text{ mm}^3$ , trigonal, space group R-3 with  $a = 34.375 (2) \text{ \AA}$ ,  $b = 34.375 (2) \text{ \AA}$ ,  $c = 7.2354 (6) \text{ \AA}$ ,  $\alpha = 90^\circ \beta = 90^\circ$ ,  $\gamma = 120^\circ$ ,  $V = 7404.0 (9) \text{ \AA}^3$ ,  $Z = 18$ ,  $\rho_{\text{calcd.}} = 1.491 \text{ g cm}^{-3}$ ,  $F(000) = 3492$ , Absorption coefficient =  $0.422 \text{ mm}^{-1}$ ,  $\text{MoK}\alpha$  radiation,  $\lambda = 0.71073 \text{ \AA}$ ,  $T = 100 \text{ K}$ , Number of measured and independent reflections =  $16448 / 4096$ ,  $R_{\text{int.}} = 0.0415$ ,  $R1 = 0.0475$ ,  $wR2 = 0.1242$ , maximum and minimum residual electron density is  $0.717$  and  $-0.585 \text{ e\AA}^{-3}$ , respectively.

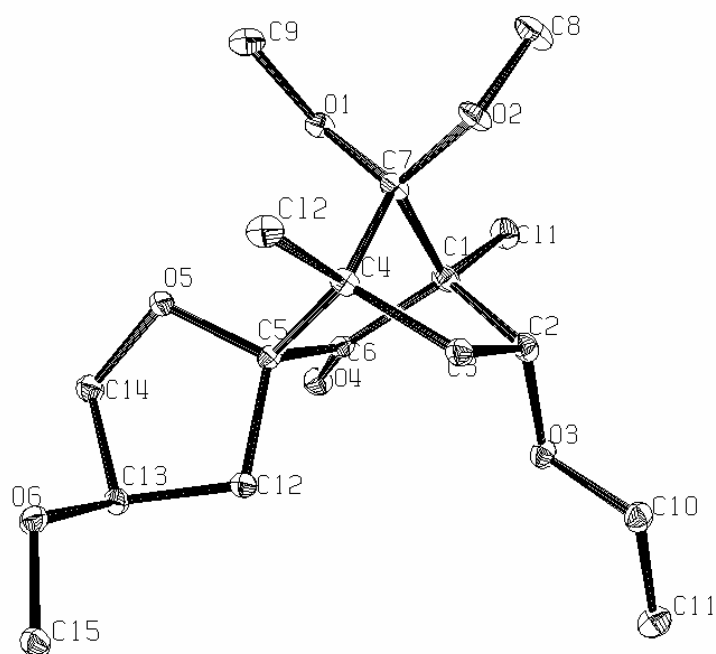

**Fig. S4** X-ray crystal structure of **13c** (ORTEP diagram). Displacement ellipsoids are drawn at 30% probability level for non-hydrogen atoms. Hydrogen atoms are omitted for clarity.



**X-ray crystal structure of 14d:** White crystals ( $\text{CH}_2\text{Cl}_2$  / Hexane).  $\text{C}_{15}\text{H}_{20}\text{Cl}_2\text{O}_7$ ,  $M_r = 383.21$ ,  $0.13 \times 0.07 \times 0.06 \text{ mm}^3$ , monoclinic, space group  $P121/c1$  with  $a = 7.3266(6) \text{ \AA}$ ,  $b = 21.5800(17) \text{ \AA}$ ,  $c = 11.0281(9) \text{ \AA}$ ,  $\alpha = 90^\circ$ ,  $\beta = 101.9950(10)^\circ$ ,  $\gamma = 90^\circ$ ,  $V = 1705.6(2) \text{ \AA}^3$ ,  $Z = 4$ ,  $\rho_{\text{calcd.}} = 1.492 \text{ g cm}^{-3}$ ,  $F(000) = 800$ , Absorption coefficient =  $0.415 \text{ mm}^{-1}$ ,  $\text{MoK}\alpha$  radiation,  $\lambda = 0.71073 \text{ \AA}$ ,  $T = 100 \text{ K}$ , Number of measured and independent reflections =  $11005 / 4161$ ,  $R_{\text{int.}} = 0.0299$ ,  $R1 = 0.0502$ ,  $wR2 = 0.1117$ , maximum and minimum residual electron density is  $0.644$  and  $-0.668 \text{ e\AA}^{-3}$ , respectively.

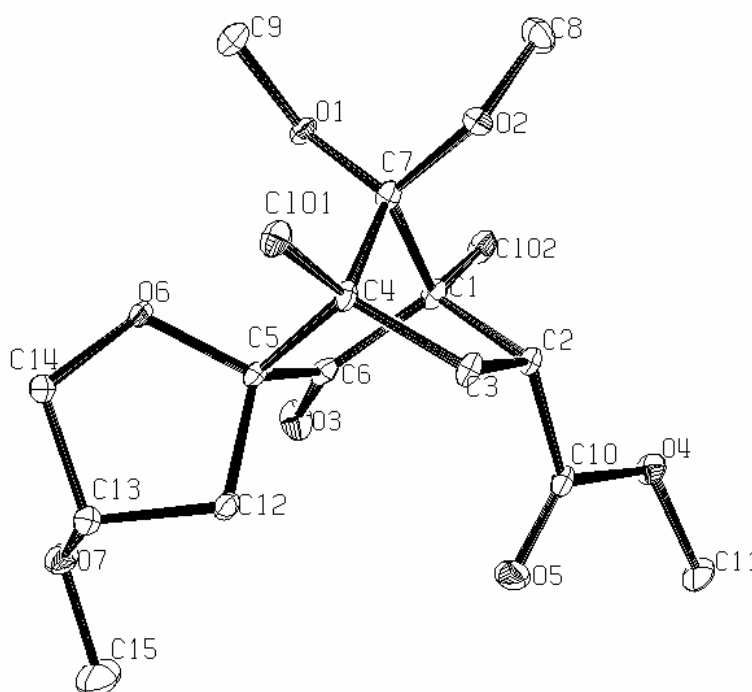

**Fig. S5** X-ray crystal structure of **14d** (ORTEP diagram). Displacement ellipsoids are drawn at 30% probability level for non-hydrogen atoms. Hydrogen atoms are omitted for clarity.

### Computational details

All theoretical calculations were performed with GAUSSIAN-03,<sup>3</sup> using the density functional/Hartee-Fock hybrid model BeckeLYP<sup>4</sup> and the basis set 6-31G(d). Reported compounds are optimized as being true minima by the absence of negative eigenvalues in the vibrational frequency analysis.

### Cartesian Coordinates of Compound **6a**.

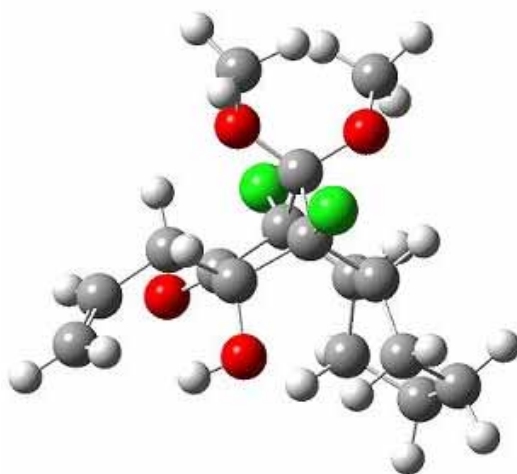

| Center Number | Atomic Number | Coordinates (Angstroms) |           |           |
|---------------|---------------|-------------------------|-----------|-----------|
|               |               | X                       | Y         | Z         |
| 1             | 6             | -1.185762               | -0.711242 | -0.084156 |
| 2             | 6             | -0.256711               | -0.045333 | 0.984956  |
| 3             | 6             | 1.163587                | -0.681044 | 1.058293  |
| 4             | 6             | 1.778511                | -0.312358 | -0.345159 |
| 5             | 6             | -0.491692               | -0.213828 | -1.390914 |
| 6             | 6             | 0.708664                | 0.633520  | -0.965328 |
| 7             | 6             | 0.116408                | 1.343479  | 0.304419  |
| 8             | 8             | 1.011689                | 2.006230  | 1.138024  |
| 9             | 6             | 1.656785                | 3.184510  | 0.636936  |
| 10            | 8             | -0.928147               | 2.170963  | -0.124204 |
| 11            | 6             | -1.622710               | 2.944366  | 0.865452  |
| 12            | 8             | -0.833786               | -0.498350 | -2.511748 |
| 13            | 8             | -1.107799               | -2.121452 | -0.004041 |
| 14            | 6             | -2.685379               | -0.292941 | -0.043468 |
| 15            | 6             | -3.503158               | -1.022301 | -1.079397 |
| 16            | 6             | -4.315202               | -2.046832 | -0.797893 |
| 17            | 17            | 1.323182                | 1.666007  | -2.294702 |
| 18            | 17            | -0.995442               | 0.076012  | 2.634412  |

|    |   |           |           |           |
|----|---|-----------|-----------|-----------|
| 19 | 6 | 1.388495  | -2.151356 | 1.449651  |
| 20 | 6 | 2.154161  | -1.554381 | -1.158772 |
| 21 | 6 | 2.854664  | -2.502215 | 1.139441  |
| 22 | 6 | 3.170663  | -2.418559 | -0.380469 |
| 23 | 1 | 1.687273  | -0.079873 | 1.804750  |
| 24 | 1 | 2.676845  | 0.295116  | -0.190643 |
| 25 | 1 | 1.953877  | 3.755785  | 1.519665  |
| 26 | 1 | 2.545006  | 2.927628  | 0.051687  |
| 27 | 1 | 0.981622  | 3.781334  | 0.017992  |
| 28 | 1 | -2.095925 | 3.763233  | 0.318925  |
| 29 | 1 | -0.934574 | 3.344388  | 1.613646  |
| 30 | 1 | -2.388598 | 2.348929  | 1.371383  |
| 31 | 1 | -1.843681 | -2.468324 | -0.542496 |
| 32 | 1 | -3.053602 | -0.535027 | 0.958432  |
| 33 | 1 | -2.769640 | 0.783638  | -0.194547 |
| 34 | 1 | -3.383605 | -0.699102 | -2.110909 |
| 35 | 1 | -4.885426 | -2.552785 | -1.572542 |
| 36 | 1 | -4.459536 | -2.399127 | 0.221985  |
| 37 | 1 | 0.717688  | -2.823732 | 0.917395  |
| 38 | 1 | 1.184661  | -2.273362 | 2.519671  |
| 39 | 1 | 2.563297  | -1.263519 | -2.132883 |
| 40 | 1 | 1.254489  | -2.146173 | -1.359073 |
| 41 | 1 | 3.087937  | -3.503927 | 1.517964  |
| 42 | 1 | 3.506580  | -1.810658 | 1.691402  |
| 43 | 1 | 4.181696  | -2.016119 | -0.521928 |
| 44 | 1 | 3.178440  | -3.422695 | -0.820733 |

---

**E(RB+HF-LYP) = -1844.16169589 a.u.**

Cartesian Coordinates of Compound **13a**.

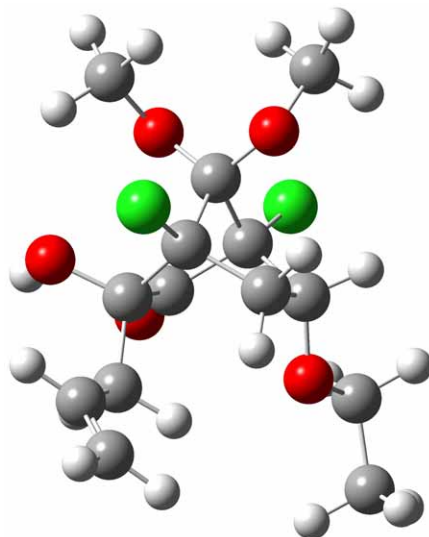

| Center Number | Atomic Number | Coordinates (Angstroms) |           |           |
|---------------|---------------|-------------------------|-----------|-----------|
|               |               | X                       | Y         | Z         |
| 1             | 6             | -0.546023               | 1.060609  | 0.846090  |
| 2             | 6             | -0.991707               | 0.417996  | -0.500412 |
| 3             | 6             | 0.121869                | 0.566517  | -1.553452 |
| 4             | 6             | 1.273556                | -0.330960 | -1.016986 |
| 5             | 6             | 0.479918                | -0.007440 | 1.328894  |
| 6             | 6             | 0.613984                | -1.041707 | 0.211157  |
| 7             | 6             | -0.904261               | -1.133666 | -0.208857 |
| 8             | 8             | -1.189360               | -1.796629 | -1.402277 |
| 9             | 6             | -1.088063               | -3.225873 | -1.421520 |
| 10            | 8             | -1.579091               | -1.649270 | 0.888666  |
| 11            | 6             | -3.014953               | -1.629557 | 0.871084  |
| 12            | 17            | 1.400487                | -2.559048 | 0.737989  |
| 13            | 17            | -2.576125               | 1.005793  | -1.120235 |
| 14            | 8             | 0.985448                | -0.006329 | 2.423604  |
| 15            | 6             | 0.125912                | 2.454140  | 0.808947  |
| 16            | 8             | -1.641409               | 1.088643  | 1.751818  |
| 17            | 6             | -0.760014               | 3.555282  | 0.296237  |
| 18            | 6             | -0.378459               | 4.471269  | -0.595035 |
| 19            | 8             | 2.373639                | 0.491295  | -0.699139 |
| 20            | 6             | 4.715978                | 0.876595  | -0.471829 |
| 21            | 6             | 3.616419                | -0.170804 | -0.430912 |
| 22            | 1             | 0.451587                | 1.597192  | -1.680442 |

|    |   |           |           |           |
|----|---|-----------|-----------|-----------|
| 23 | 1 | -0.242508 | 0.192284  | -2.509695 |
| 24 | 1 | 1.564852  | -1.096223 | -1.748353 |
| 25 | 1 | -0.057241 | -3.545727 | -1.604564 |
| 26 | 1 | -1.438487 | -3.663433 | -0.483346 |
| 27 | 1 | -1.724505 | -3.556484 | -2.245658 |
| 28 | 1 | -3.401778 | -1.870290 | -0.123088 |
| 29 | 1 | -3.326678 | -2.396100 | 1.584547  |
| 30 | 1 | -3.379695 | -0.650520 | 1.187138  |
| 31 | 1 | 1.070153  | 2.419593  | 0.258075  |
| 32 | 1 | 0.394916  | 2.650543  | 1.858025  |
| 33 | 1 | -1.260679 | 1.001501  | 2.643504  |
| 34 | 1 | -1.765172 | 3.586635  | 0.711930  |
| 35 | 1 | -1.047693 | 5.262832  | -0.921026 |
| 36 | 1 | 0.619756  | 4.470292  | -1.029397 |
| 37 | 1 | 5.686414  | 0.412678  | -0.264408 |
| 38 | 1 | 4.537659  | 1.650906  | 0.281441  |
| 39 | 1 | 4.760536  | 1.355288  | -1.455412 |
| 40 | 1 | 3.784226  | -0.949030 | -1.191261 |
| 41 | 1 | 3.581435  | -0.662679 | 0.548360  |

---

**E(RB+HF-LYP)** = -1841.95516431 a.u.

### References:

1. A. Altomare, G. Gasparano, C. Giacovazzo, A. Guagliardi, *J. Appl. Cryst.* 1993, **26**, 343-350.
2. G. M. Sheldrick, SHELXL97, Program for the Refinement of Crystal Structures, University of Göttingen, Germany, 1997.
3. M. J. Frisch, G. W. Trucks, H. B. Schlegel, G. E. Scuseria, M. A. Robb, J. R. Cheeseman, J. A. Montgomery, Jr., T. Vreven, K. N. Kudin, J. C. Burant, J. M. Millam, S. S. Iyengar, J. Tomasi, V. Barone, B. Mennucci, M. Cossi, G. Scalmani, N. Rega, G. A. Petersson, H. Nakatsuji, M. Hada, M. Ehara, K. Toyota, R. Fukuda, J. Hasegawa, M. Ishida, T. Nakajima, Y. Honda, O. Kitao, H. Nakai, M. Klene, X. Li, J. E. Knox, H. P. Hratchian, J. B. Cross, C. Adamo, J. Jaramillo, R. Gomperts, R. E. Stratmann, O. Yazyev, A. J. Austin, R. Cammi, C. Pomelli, J. W. Ochterski, P. Y. Ayala, K. Morokuma, G. A. Voth, P. Salvador, J. J. Dannenberg, V. G. Zakrzewski, S. Dapprich, A. D. Daniels, M. C. Strain, O. Farkas, D. K. Malick, A. D. Rabuck, K. Raghavachari, J. B. Foresman, J. V. Ortiz, Q. Cui, A. G. Baboul, S. Clifford, J. Cioslowski, B. B. Stefanov, G. Liu, A. Liashenko, P. Piskorz, I. Komaromi, R. L. Martin, D. J. Fox, T.

Keith, M. A. Al-Laham, C. Y. Peng, A. Nanayakkara, M. Challacombe, P. M. W. Gill, B. Johnson, W. Chen, M. W. Wong, C. Gonzalez and J. A. Pople, *Gaussian 03*, Revision B.05, Gaussian, Inc., Pittsburgh PA, 2003.

4. A. D. Becke, *J. Chem. Phys.*, 1993, **98**, 5648-5652.
